# Supplementary material for: Neutrophil-to-Lymphocyte Ratio in Ovarian Cancer Patients with Low CA125 Concentration
Source: PubMed Central journal article supplement (PMC6614957; doi:10.1155/2019/8107906), 2019-06-25
Supplement: 8107906.f1.pdf [file 8107906.f1.pdf]

**Supplemental Table 1.** Patient Population Characteristics.

| Group          | Average Age | n (%)      |
|----------------|-------------|------------|
| Healthy        | 45 (28-71)  | 70 (100)   |
| Ovarian cancer | 55 (23-80)  | 173 (100)  |
| FIGO stage     |             |            |
| Stage I        |             | 5 (2.9)    |
| Stage II       |             | 19 (11.0)  |
| Stage III      |             | 34 (19.7)  |
| Stage IV       |             | 21 (12.1)  |
| Grade          |             |            |
| Grade 1        |             | 11 (6.4)   |
| Grade 2/3      |             | 67 (38.7)  |
| Metastases     |             |            |
| Yes            |             | 63 (36.4)  |
| No             |             | 110 (63.6) |

Abbreviation: FIGO, The International Federation of Gynecology and Obstetrics.

**Supplemental Table 2** Overview the WBC parameters, NLR and some normal cancer screening tumor markers for 173 epithelial ovarian cancer patients.

|                                  | Number of samples | Mean   | Median | Range         |
|----------------------------------|-------------------|--------|--------|---------------|
| Neutrophil (x10 <sup>9</sup> /L) | 173               | 4.58   | 4.20   | 0.54-14.86    |
| Lymphocyte (x10 <sup>9</sup> /L) | 173               | 1.64   | 1.65   | 0.34-5.45     |
| Monocyte (x10 <sup>9</sup> /L)   | 173               | 0.42   | 0.39   | 0.02-1.36     |
| NLR                              | 173               | 3.33   | 2.61   | 0.40-22.57    |
| CA125 (U/mL)                     | 173               | 944.90 | 410.80 | 3.45-21269.00 |
| SCC (μg/L)                       | 168               | 0.85   | 0.60   | 0.20-11.30    |
| CEA (μg/L)                       | 170               | 4.90   | 1.27   | 0.20-211.20   |
| HCG (mIU/mL)                     | 168               | 4.35   | 1.37   | 0.10-235.20   |
| AFP (ng/mL)                      | 167               | 9.36   | 2.51   | 0.61-1004.00  |
| CA242 (U/mL)                     | 99                | 93.08  | 6.23   | 0.58-3604.87  |
| CA72-4 (U/mL)                    | 84                | 64.83  | 6.58   | 0.41-2256.00  |
| CA19-9 (U/mL)                    | 82                | 202.50 | 9.75   | 0.60-13987.00 |

**Supplemental Table 3** Comparison of pathological characteristics between high CA125 concentrations and low CA125 concentrations in epithelial ovarian cancer patients.

| Characteristic | CA125 ≤ 35U/ml<br>(n = 21) | CA125 > 35U/ml<br>(n = 152) | <i>P</i> value |
|----------------|----------------------------|-----------------------------|----------------|
| Grade          |                            |                             |                |
| Grade 1        | 2 (9.5)                    | 6 (3.9)                     | 0.235          |
| Grade 2/3      | 6 (28.6)                   | 69 (45.4)                   |                |
| Unknown        | 13 (61.9)                  | 77 (50.7)                   |                |
| FIGO stage     |                            |                             |                |
| Stage I / II   | 3 (14.3)                   | 18 (11.8)                   | 0.134          |
| Stage III/IV   | 3 (14.3)                   | 55 (36.2)                   |                |
| Unknown        | 15 (71.4)                  | 79 (52.0)                   |                |
| Metastases     |                            |                             |                |
| Yes            | 4 (19.0)                   | 59 (38.8)                   | 0.078          |
| No             | 17 (81.0)                  | 93 (61.2)                   |                |

**Supplemental Table 4** Baseline data of the subjected patients.

| Parameters                     | Healthy People Group<br>(n = 70) | Low CA125 Group<br>(n = 21) | High CA125 Group<br>(n = 152) |
|--------------------------------|----------------------------------|-----------------------------|-------------------------------|
| Age (years)                    | 45.00 (28-71)                    | 54.50 (23-71)               | 55.00 (24-80)                 |
| CA125 (U/mL)                   | 16.38 (1.56-33.84)               | 15.88 (3.45-61.67)          | 534.40 (40.04-21269.00)       |
| Neutrophil ( $\times 10^9/L$ ) | 3.00 (1.00-5.80)                 | 3.31 (1.78-8.89)            | 4.32 (0.54-14.86)             |
| Lymphocyte ( $\times 10^9/L$ ) | 2.00 (0.70-4.20)                 | 1.87 (0.65-2.81)            | 1.61 (0.34-5.45)              |
| NLR                            | 1.52 (0.33-3.08)                 | 1.84 (1.01-4.35)*           | 2.77 (0.40-22.57)             |
